# Supplementary material for: Stimuli-Sensitive Pyrenylated Hydrogels as Optical Sensing Platform for Multiple Metal Ions
Source: MDPI journal article supplement (doi:10.3390/org4030032), 2023-09-04
Supplement: s1 [file s1]

# **Stimuli-Sensitive Pyrenylated Hydrogels as Optical Sensing Platform for Multiple Metal Ions**

Dipen Biswakarma,<sup>1,2</sup> Nilanjan Dey,<sup>3</sup> Santanu Bhattacharya\*<sup>1,4</sup>

<sup>1</sup>Department of Organic Chemistry, Indian Institute of Science, Bangalore 560012, India

<sup>2</sup>Solid State and Structural Chemistry Unit, Indian Institute of Science, Bangalore 560012, India

<sup>3</sup>Department of Chemistry, Birla Institute of Technology and Science Pilani, Hyderabad 500078, India

<sup>4</sup>Indian Institute of Science Education and Research, Tirupati, A.P. 517507, India

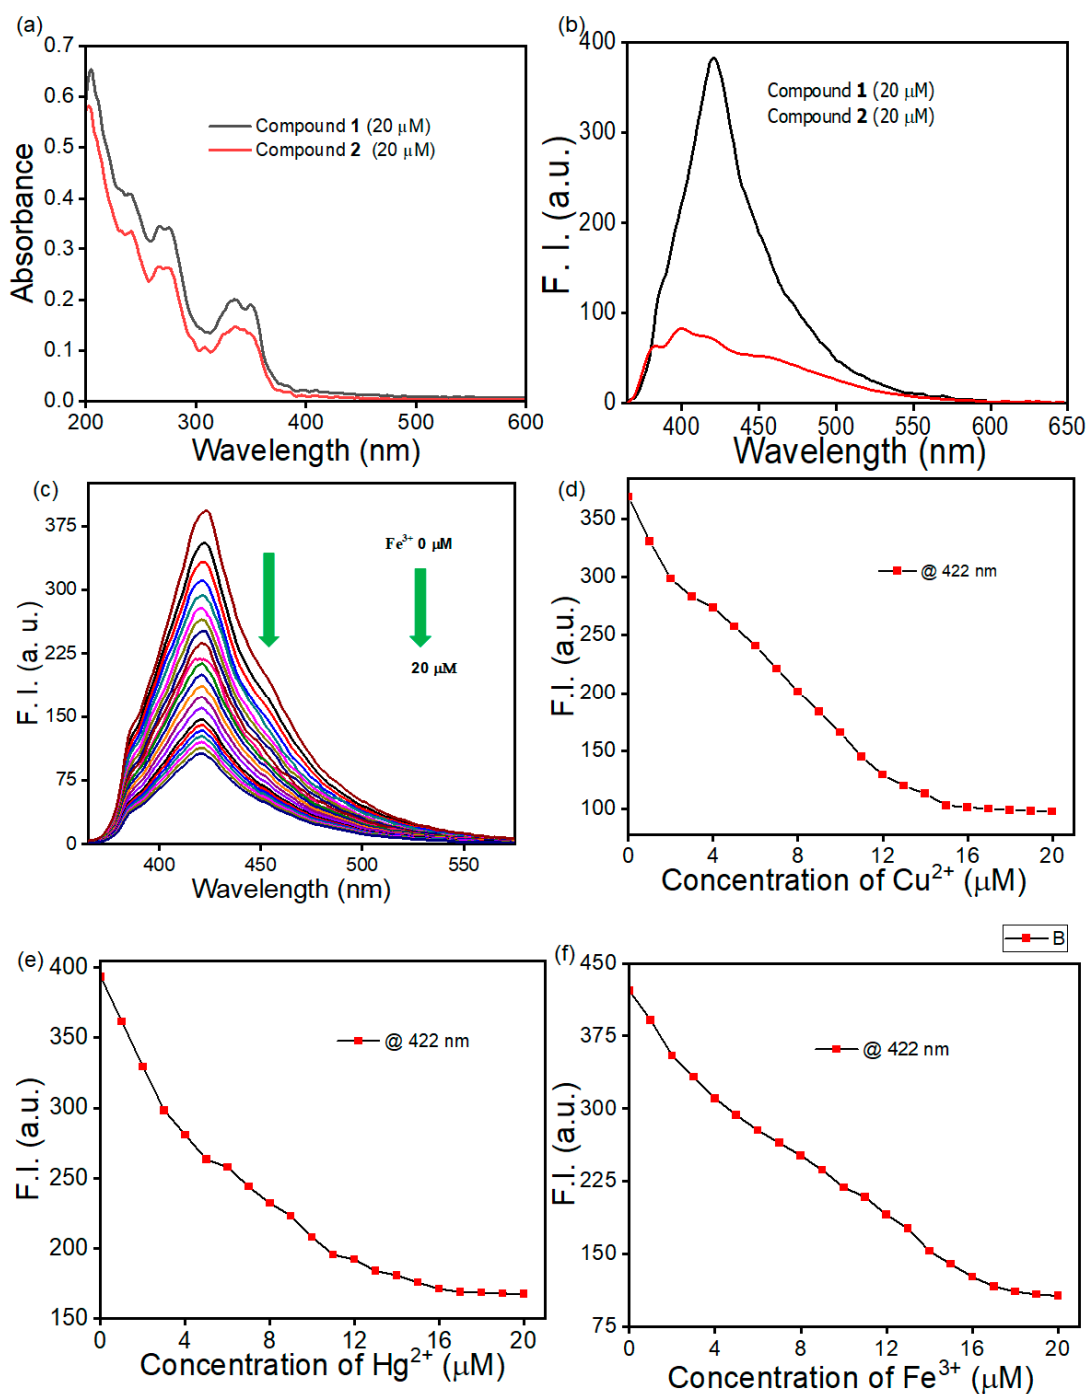

**Figure S1.** (a) Absorbance spectra of the compound **1** (20  $\mu\text{M}$ ) and **2** (20  $\mu\text{M}$ ) in water. (b) Emission spectra of compound **1** (20  $\mu\text{M}$ ,  $\lambda_{\text{ex}} = 345 \text{ nm}$ ) and **2** (20  $\mu\text{M}$ ,  $\lambda_{\text{ex}} = 345 \text{ nm}$ ) in water. (c) Fluorescence titration of compound **1** (20  $\mu\text{M}$ ,  $\lambda_{\text{ex}} = 345 \text{ nm}$ ) with increasing concentration of  $\text{Fe}^{3+}$ . Change in the emission intensity of compound **1** in the presence of increasing concentrations of (d)  $\text{Cu}^{2+}$ , (e)  $\text{Hg}^{2+}$ , and (f)  $\text{Fe}^{3+}$ .

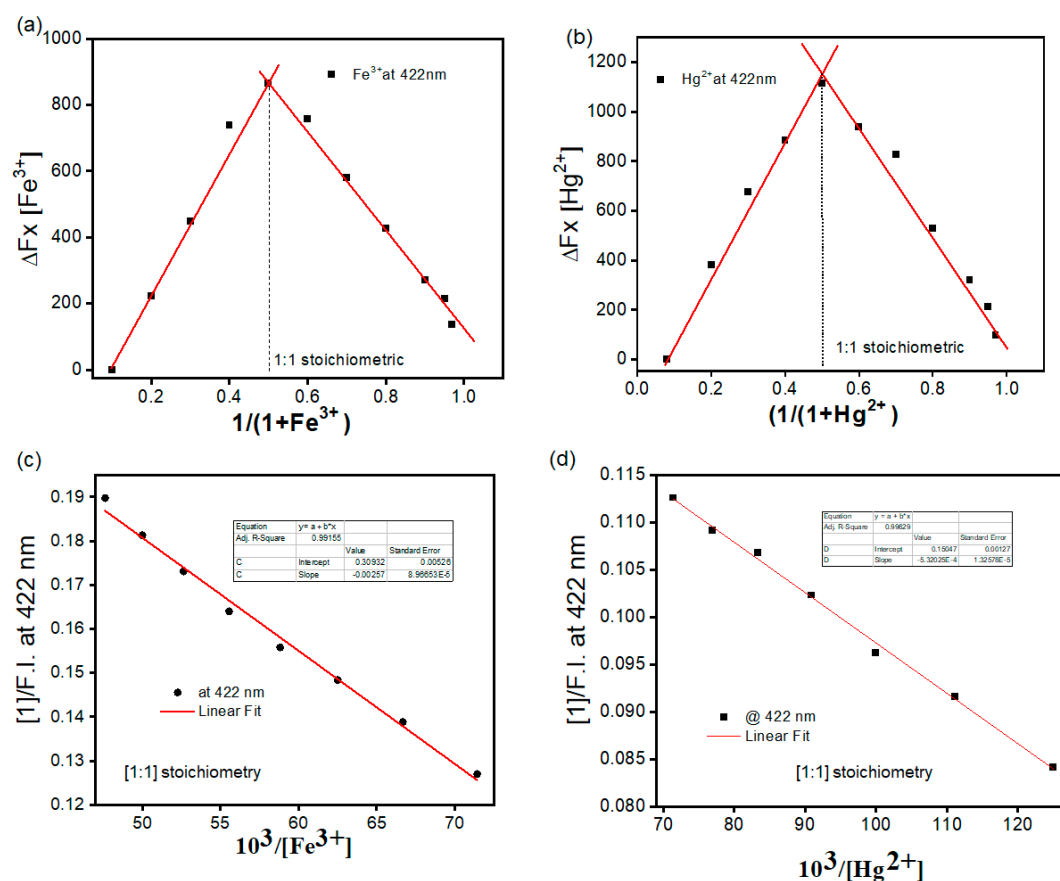

**Figure S2:** Jobs plot for the interaction of compound 1 with (a)  $\text{Fe}^{3+}$ , (b)  $\text{Hg}^{2+}$ . Calculation of binding constant for compound 1 with (c)  $\text{Fe}^{3+}$ , (d)  $\text{Hg}^{2+}$ .

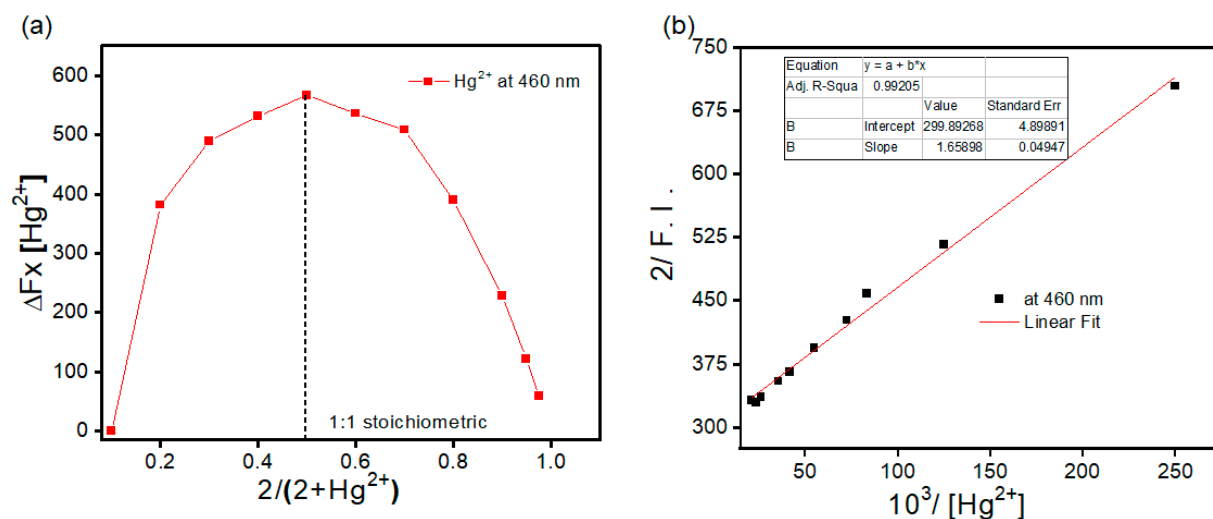

**Figure S3:** (a) Jobs plot for the interaction of compound 2 with  $\text{Hg}^{2+}$ . (b) Calculation of binding constant for the interaction of compound 2 with  $\text{Hg}^{2+}$ .

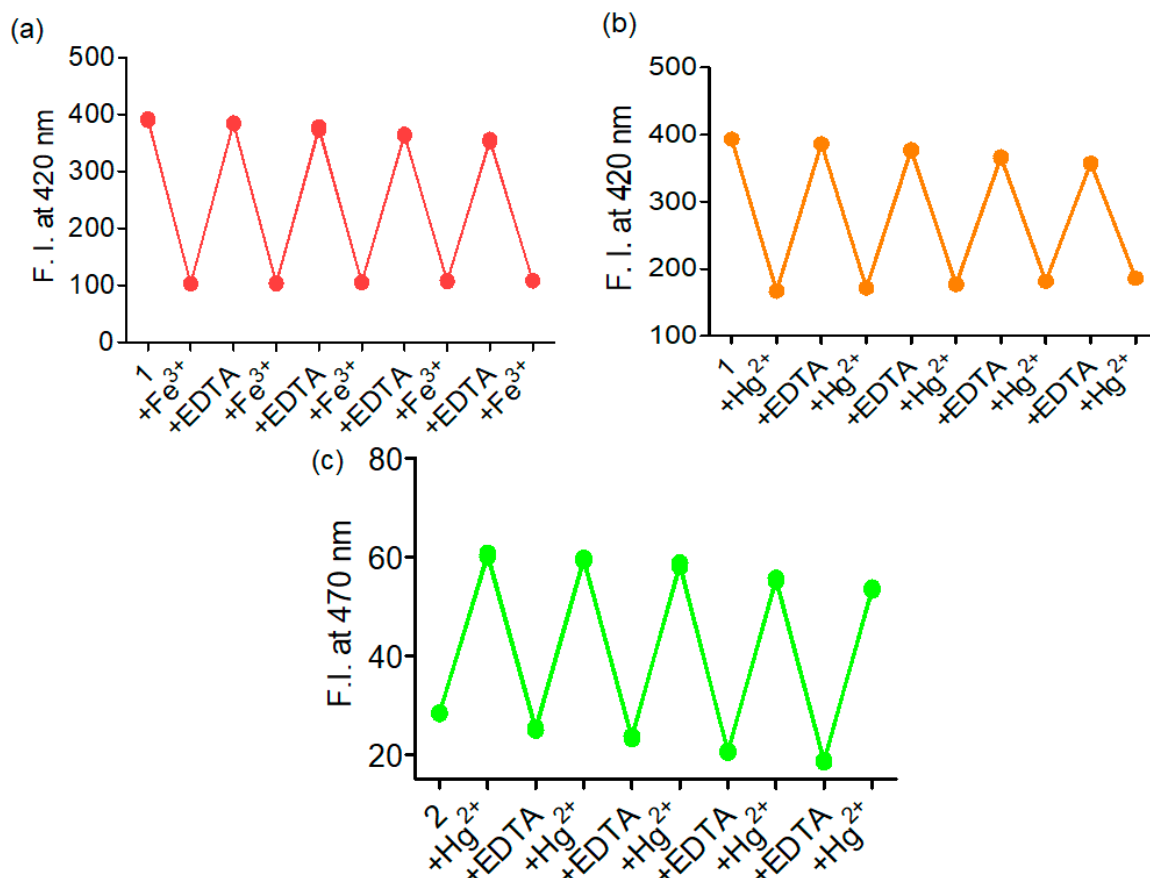

**Figure S4:** EDTA-mediated recovery plot for the interaction of compound **1** with (a)  $\text{Fe}^{3+}$  and (b)  $\text{Hg}^{2+}$ . (c) EDTA-mediated recovery plot for the interaction of compound **2** with  $\text{Hg}^{2+}$ .

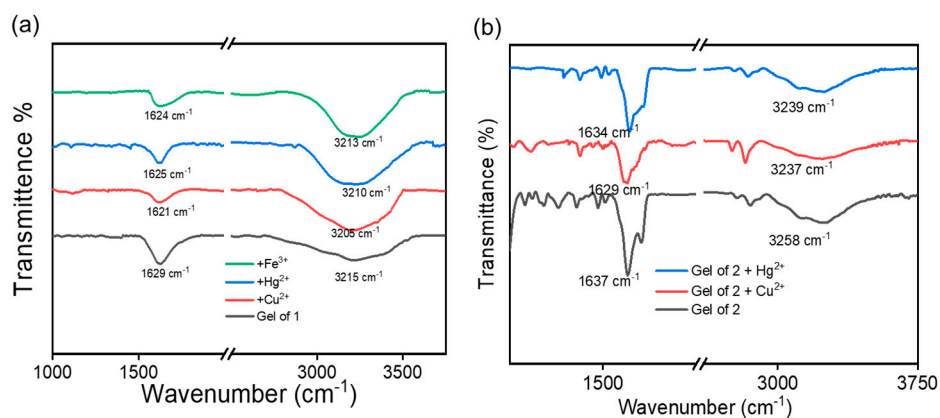

**Figure S5:** FT-IR spectra for the interaction of (a) compound **1** with  $\text{Cu}^{2+}$ ,  $\text{Fe}^{3+}$ , and  $\text{Hg}^{2+}$ , and (b) compound **2** with  $\text{Cu}^{2+}$  and  $\text{Hg}^{2+}$ .

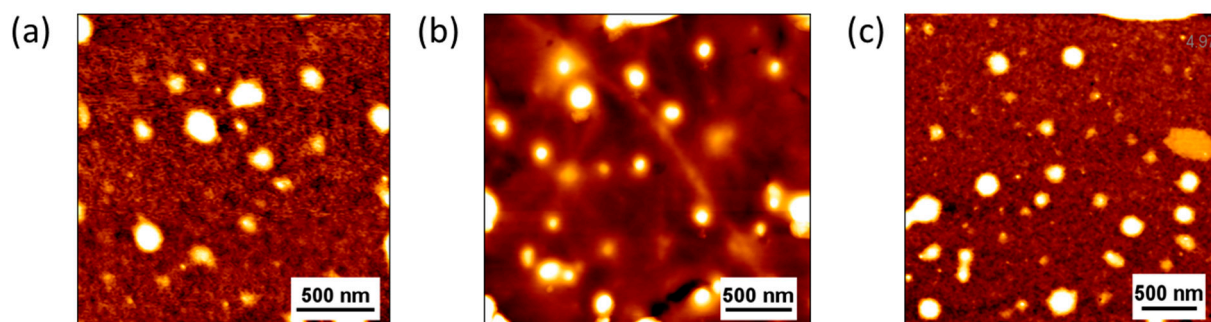

**Figure S6:** AFM images for the interaction of compound **1** with  $\text{Cu}^{2+}$ ,  $\text{Fe}^{3+}$ , and  $\text{Hg}^{2+}$ .

**Table S1:** Recovery experiment of (a)  $\text{Cu}^{2+}$ , (b)  $\text{Fe}^{3+}$ , and (c)  $\text{Hg}^{2+}$  using compound **1** (20  $\mu\text{M}$ ) and in a tap water sample.

(a)

| $\text{Cu}^{2+}$<br>added<br>( $\mu\text{M}$ ) | $\text{Cu}^{2+}$ calculated<br>Std plot: $Y = 341.71 - 17.41x$ |       |       | $\text{Cu}^{2+}$<br>found | Recovery | RSD (%) |
|------------------------------------------------|----------------------------------------------------------------|-------|-------|---------------------------|----------|---------|
| 0                                              | 0                                                              | 0     | 0     | 0                         | 0        | 0       |
| 2                                              | 2.12                                                           | 2.25  | 2.05  | 2.14                      | 107.00   | 4.74    |
| 4                                              | 4.06                                                           | 4.22  | 4.11  | 4.13                      | 103.25   | 1.98    |
| 6                                              | 6.11                                                           | 6.02  | 6.09  | 6.07                      | 101.1    | 0.78    |
| 8                                              | 8.23                                                           | 8.09  | 8.15  | 8.16                      | 102.00   | 0.86    |
| 10                                             | 10.14                                                          | 10.04 | 10.31 | 10.16                     | 101.6    | 1.34    |

(b)

| $\text{Hg}^{2+}$<br>added<br>( $\mu\text{M}$ ) | $\text{Hg}^{2+}$ calculated<br>Std plot: $Y = 322.02 - 12.72x$ |       |       | $\text{Hg}^{2+}$<br>found | Recovery | RSD (%) |
|------------------------------------------------|----------------------------------------------------------------|-------|-------|---------------------------|----------|---------|
| 0                                              | 0                                                              | 0     | 0     | 0                         | 0        | 0       |
| 2                                              | 2.20                                                           | 2.15  | 2.11  | 2.15                      | 103.00   | 2.09    |
| 4                                              | 4.34                                                           | 4.12  | 4.48  | 4.31                      | 107.83   | 4.21    |
| 6                                              | 6.09                                                           | 6.19  | 6.37  | 6.22                      | 103.61   | 2.28    |
| 8                                              | 8.09                                                           | 8.36  | 8.21  | 8.22                      | 102.75   | 1.65    |
| 10                                             | 10.09                                                          | 10.39 | 10.15 | 10.21                     | 102.10   | 1.55    |

(c)

| $\text{Fe}^{3+}$<br>added<br>( $\mu\text{M}$ ) | $\text{Fe}^{3+}$ calculated<br>Std plot: $Y = 351.27 - 14.40x$ |       |       | $\text{Fe}^{3+}$<br>found | Recovery | RSD (%) |
|------------------------------------------------|----------------------------------------------------------------|-------|-------|---------------------------|----------|---------|
| 0                                              | 0                                                              | 0     | 0     | 0                         | 0        | 0       |
| 2                                              | 2.18                                                           | 2.05  | 2.12  | 2.12                      | 102.56   | 3.07    |
| 4                                              | 4.46                                                           | 4.15  | 4.28  | 4.30                      | 107.50   | 3.62    |
| 6                                              | 6.19                                                           | 6.03  | 6.43  | 6.22                      | 103.67   | 3.24    |
| 8                                              | 8.15                                                           | 8.35  | 8.07  | 8.19                      | 102.37   | 1.76    |
| 10                                             | 10.11                                                          | 10.35 | 10.06 | 10.17                     | 101.70   | 1.52    |

**Table S2:** Recovery experiment of (a)  $\text{Cu}^{2+}$  and (b)  $\text{Hg}^{2+}$  using compound **2** (20  $\mu\text{M}$ ) in a tap water sample.

(a)

| $\text{Cu}^{2+}$<br>added<br>( $\mu\text{M}$ ) | $\text{Cu}^{2+}$ calculated<br>Std plot: $Y = 48.56 - 1.14x$ |       |       | $\text{Cu}^{2+}$<br>found | Recovery | RSD<br>(%) |
|------------------------------------------------|--------------------------------------------------------------|-------|-------|---------------------------|----------|------------|
| 0                                              | 0                                                            | 0     | 0     | 0                         | 0        | 0          |
| 2                                              | 2.22                                                         | 2.16  | 2.30  | 2.23                      | 103.67   | 3.15       |
| 4                                              | 4.16                                                         | 4.32  | 4.01  | 4.16                      | 104.08   | 3.72       |
| 6                                              | 6.18                                                         | 6.09  | 6.29  | 6.19                      | 103.11   | 1.62       |
| 8                                              | 8.12                                                         | 8.02  | 8.25  | 8.13                      | 101.63   | 1.42       |
| 10                                             | 10.04                                                        | 10.19 | 10.28 | 10.17                     | 101.70   | 1.19       |

(b)

| $\text{Hg}^{2+}$ added<br>( $\mu\text{M}$ ) | $\text{Hg}^{2+}$ calculated<br>Std plot: $Y = 0.935x + 31.64$ |       |       | $\text{Hg}^{2+}$<br>found | Recovery | RSD<br>(%) |
|---------------------------------------------|---------------------------------------------------------------|-------|-------|---------------------------|----------|------------|
| 0                                           | 0                                                             | 0     | 0     | 0                         | 0        | 0          |
| 2                                           | 2.30                                                          | 2.15  | 2.22  | 2.21                      | 102.50   | 3.38       |
| 4                                           | 4.16                                                          | 4.02  | 4.35  | 4.18                      | 104.41   | 3.97       |
| 6                                           | 6.23                                                          | 6.05  | 6.33  | 6.20                      | 103.39   | 2.29       |
| 8                                           | 8.01                                                          | 8.22  | 8.39  | 8.21                      | 102.58   | 2.32       |
| 10                                          | 10.25                                                         | 10.11 | 10.35 | 10.24                     | 102.36   | 1.18       |
